# Supplementary material for: High-performance hybrid perovskite solar cells with polythiophene as hole-transporting layer via electrochemical polymerization
Source: Royal Society of Chemistry journal article supplement (doi:10.1039/c4ra05578k), 2014-07-14
Supplement: c4ra05578k1.pdf [file c4ra05578k1.pdf]

**Supporting Information**  
**for**  
**High-Performance Hybrid Perovskite Solar Cells with**  
**Polythiophene as Hole-Transporting Layer via Electrochemical**  
**Polymerization**

**Weibo Yan, ‡ Yunlong Li, ‡ Weihai Sun, Haitao Peng, Senyun Ye, Zhiwei Liu\*,**  
**Zuqiang Bian\*, Chunhui Huang**

*State Key Laboratory of Rare Earth Materials Chemistry and Applications, Peking University, Beijing, 100871, P. R. China.*

\*Corresponding Author: Zuqiang Bian, Peking University, Beijing, 100871, P. R. China. Tel: +86 (10) 62753544, email:

[bianzq@pku.edu.cn](mailto:bianzq@pku.edu.cn)

‡Weibo Yan and Yunlong Li contributed equally to this work that was supported by the National Basic Research Program (2011CB933303) and the National Natural Science Foundation of China (NSFC) (21321001, 21371012).

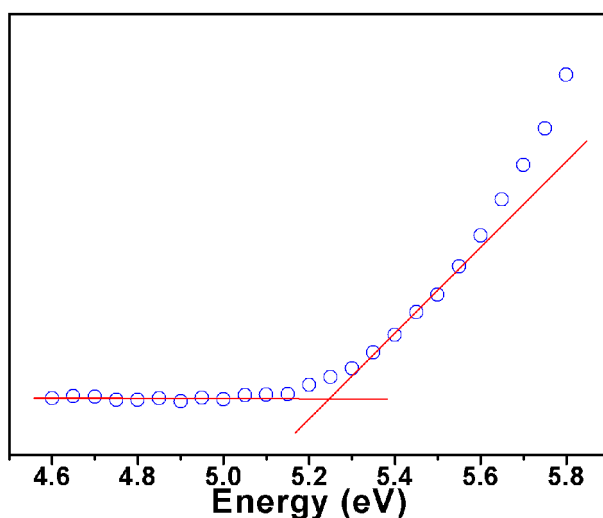

**Figure S1.** The ultraviolet photoelectron yield spectroscopy of the polythiophene film (36 nm).

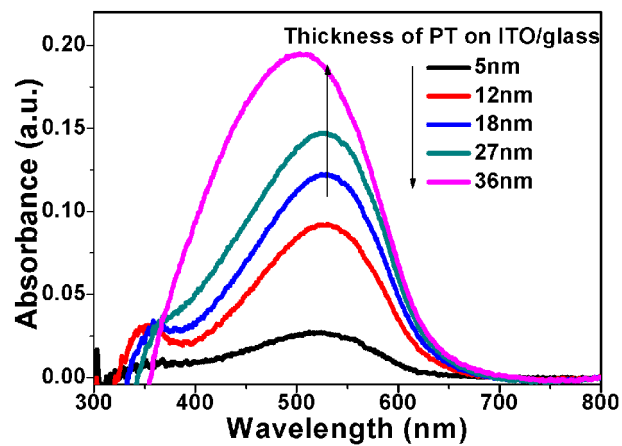

Figure S2. Absorbance spectra of the polythiophene films with different thickness.
